# Supplementary material for: Inadequate Activation of the GTPase RhoA Contributes to the Lack of Fibronectin Matrix Assembly in von Hippel-Lindau Protein-defective Renal Cancer Cells
Source: PubMed Central journal article supplement — J Biol Chem. 2008 Sep 5;283(36):24982–90. doi: 10.1074/jbc.M709390200 (PMC2529126; doi:10.1074/jbc.m709390200), 2008-09-05

**Supplementary Figure 1. RhoA activation state in VHL (+) and (-) RCC4 cell lines.**

Cells ( $7 \times 10^6$ ) were incubated for three hours in serum free media and this was considered as time zero for basal levels of RhoA activity. Cells were then maintained in culture with complete media for an additional period of 72 hours. After each time point, cells were lysed and analyzed by the G-LISA RhoA activation assay biochem kit with cat#BK124 (Cytoskeleton, Denver, Co) following the procedure indicated by the manufacturer. The average of three independent experiments is shown ( $P \leq 0.05$ ). VHL (+) (black bars) and VHL (-) (grey bars).

**Supplementary Figure 2. VHL (+) and VHL (-) cells infection with a constitutively active or dominant negative RhoA mutants.** 786-O cells and their VHL (+) counterparts were infected with a retroviral vector expressing GFP alone or with a constitutively active (RhoA-Q63L) or dominant negative (RhoA N19) RhoA mutants. Three days after infection GFP counts were measured by flow-cytometry and the protein over-expression was analyzed by western blot using an anti-RhoA mAb.

Feijoo-Cuaresma M. Supplementary Figure 1

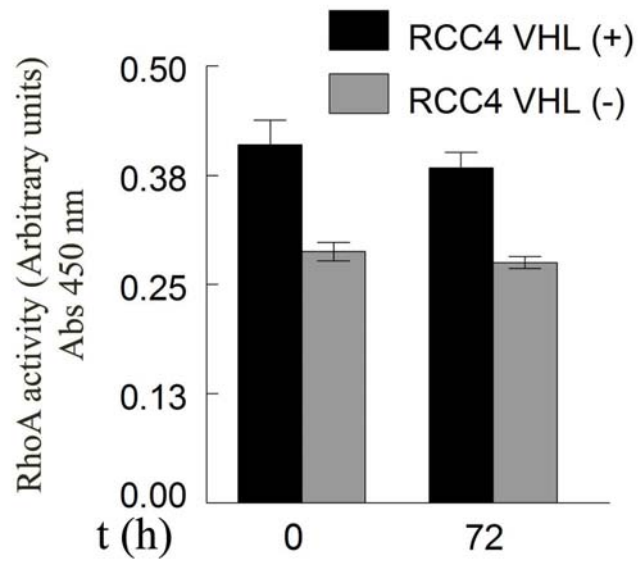

Feijoo-Cuaresma M. Supplementary Figure 2

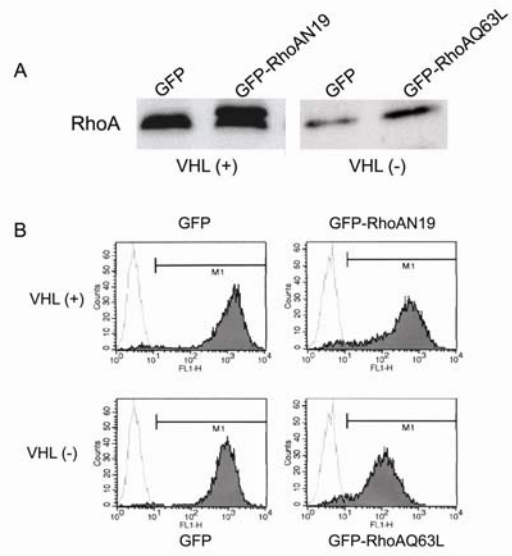

Supplement: M709390200_2.pdf [file M709390200_2.pdf]
